# Supplementary material for: Multi-Modal Multi-Spectral Intravital Macroscopic Imaging of Signaling Dynamics in Real Time during Tumor–Immune Interactions
Source: PubMed Central journal article supplement (PMC7996138; doi:10.3390/cells10030489), 2021-02-25
Supplement: cells-10-00489-s001.pdf [file cells-10-00489-s001.pdf]

## 1. Supplemental Materials

### 1.1. Supplemental Figure

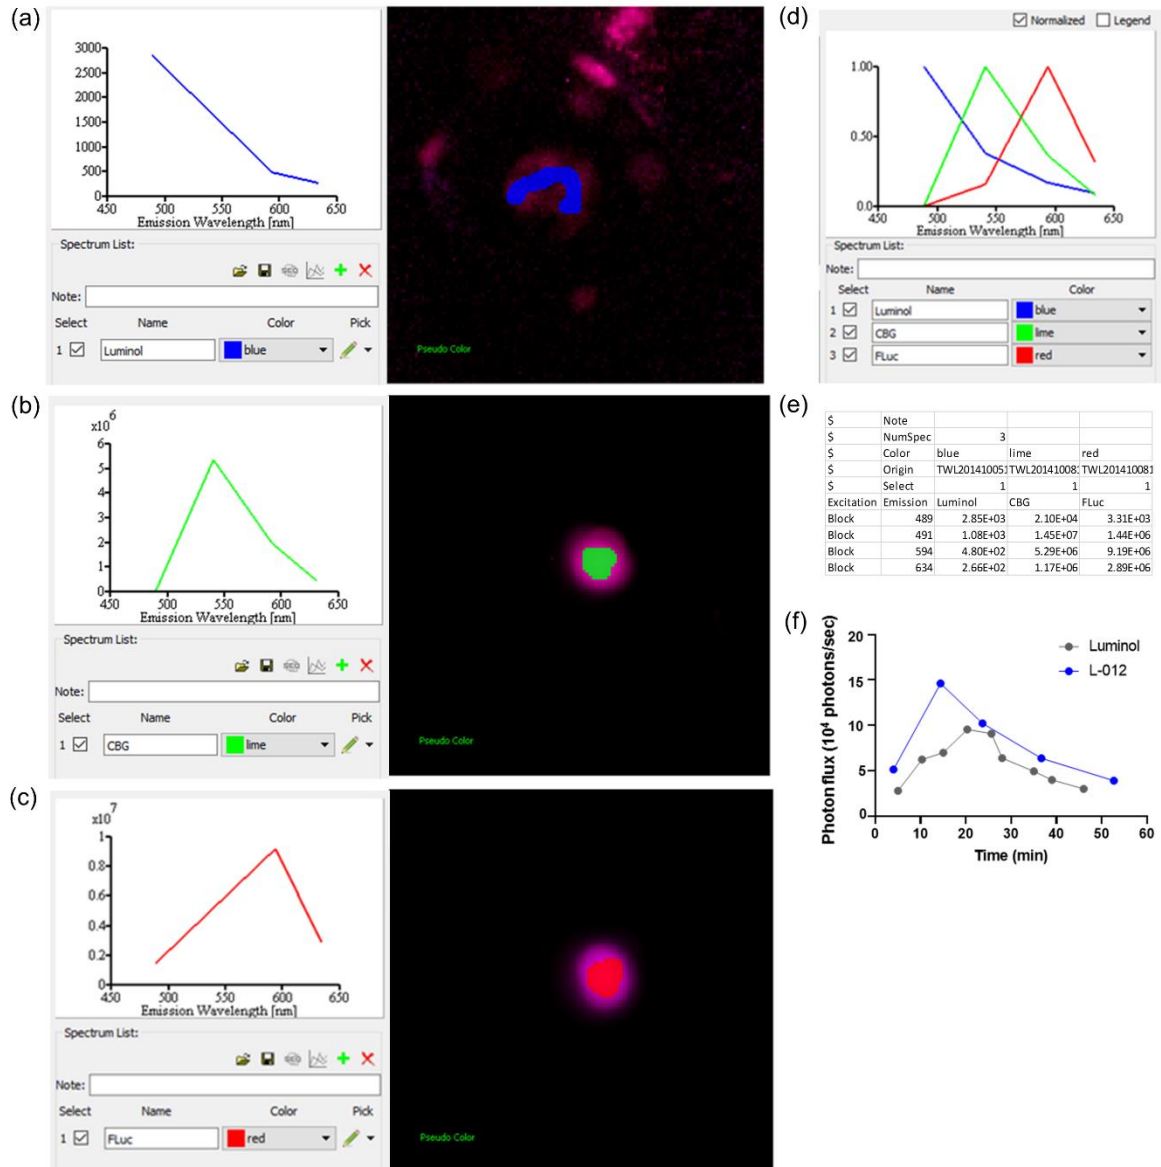

**Figure S1.** Generation of pure bioluminescent spectra *in vivo* for spectral unmixing. Representative raw emission spectra *in vivo* for (a) luminol, (b) click beetle green (CBG) and (c) firefly luciferase (FLuc). (d) User-generated spectral library to unmix luminol, CBG, and FLuc built from the average emission spectra in window chamber-bearing animals using luminol ( $n = 3$  animals), CBG ( $n = 6$  animals) or FLuc ( $n = 6$  animals). (e) Raw data of the average emission spectra in user-generated spectral library for Living Image. (f) Dynamic temporal imaging of luminol and L-012 reporters in skin window chamber-bearing animals ( $n = 2$  animals for each reporter).

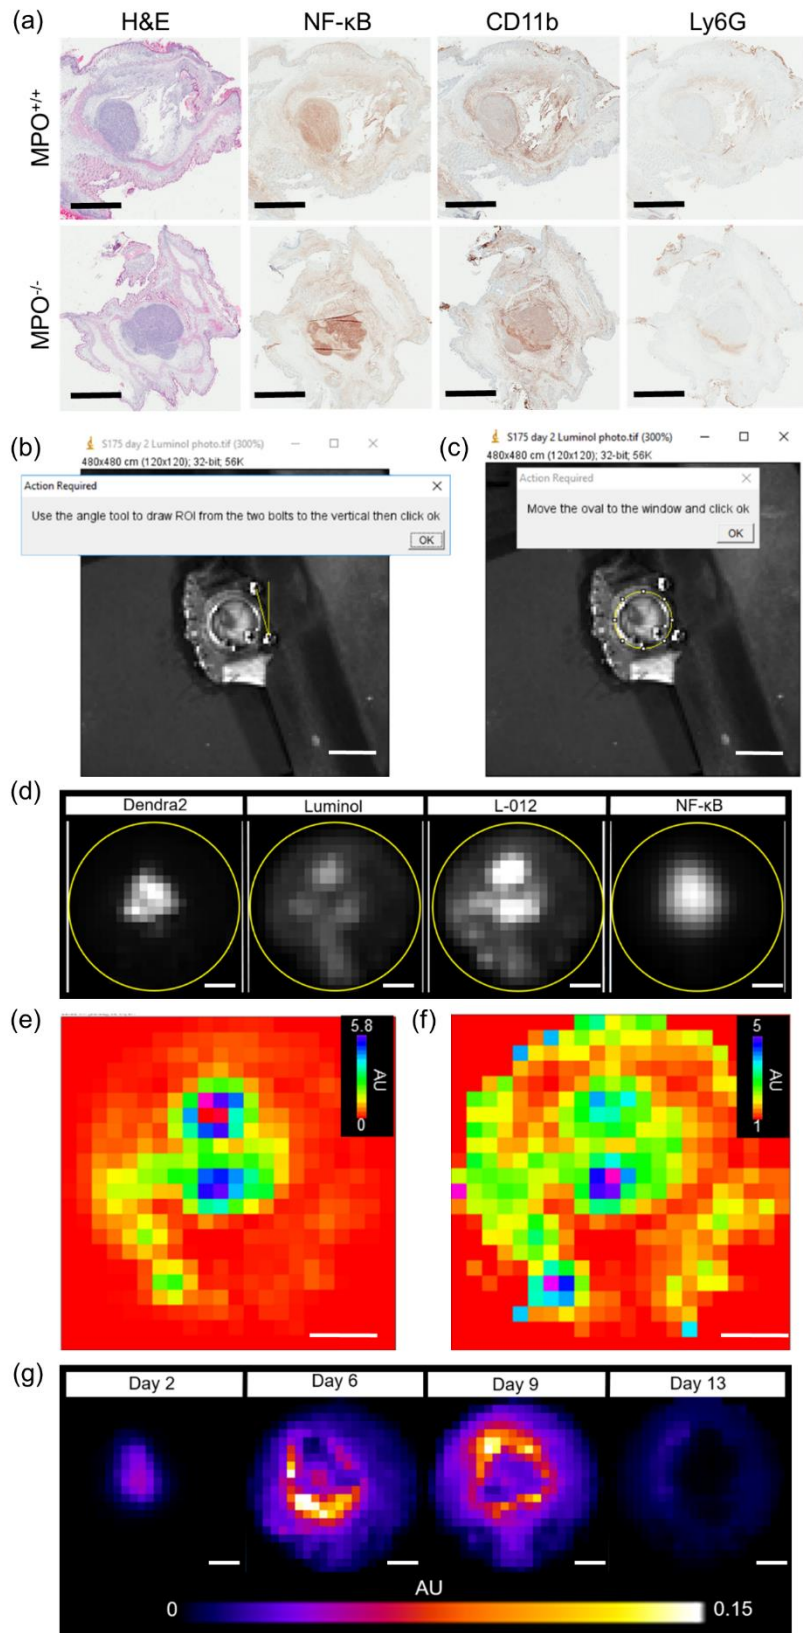

**Figure S2.** Representative immunohistology (a) of *MPO*<sup>+/+</sup> and *MPO*<sup>-/-</sup> window chamber skin flaps at endpoint showing H&E, NF-κB, CD11b and Ly6G staining confirming NF-κB protein levels and presence of myeloid cells (scale bar, 4 mm). (b,c) ImageJ macro to align window chamber for quantification. Representative image of ImageJ macro for (b) aligning and (c) cropping window chamber. (d) Representative image of a single time point of window chamber imaging post processing

with ImageJ macro. Representative images of the overlap and differences between luminol and L-012 images by (e) pixelwise subtraction or (f) division. (g) Representative image of the same animal over time of NF- $\kappa$ B-Fluc pixelwise division by Dendra2 fluorescence.

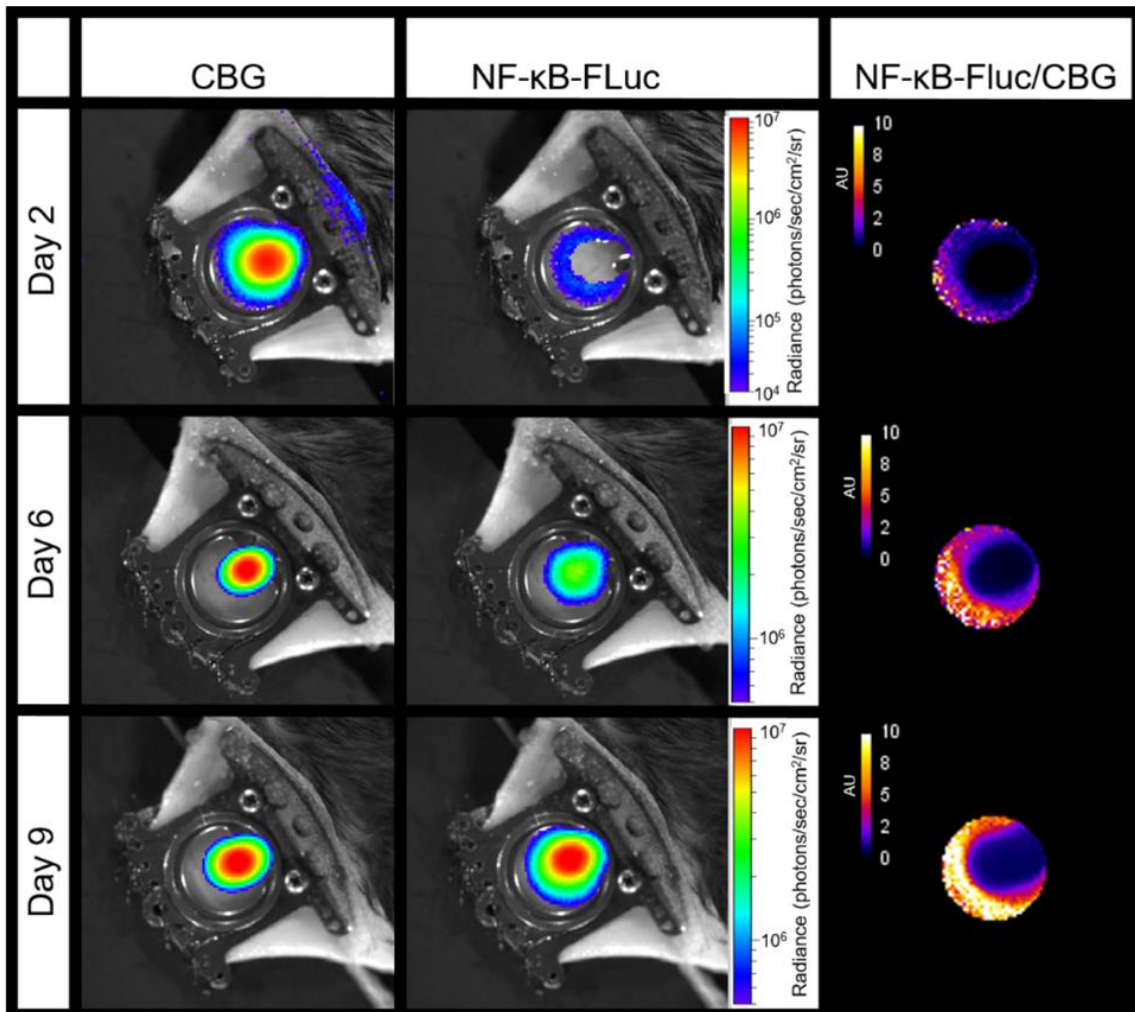

**Figure S3.** Challenges in BLI spectral unmixing ( $n = 3$  animals) in window chamber animals using B16F10 NF- $\kappa$ B-FLuc CBG tumors.

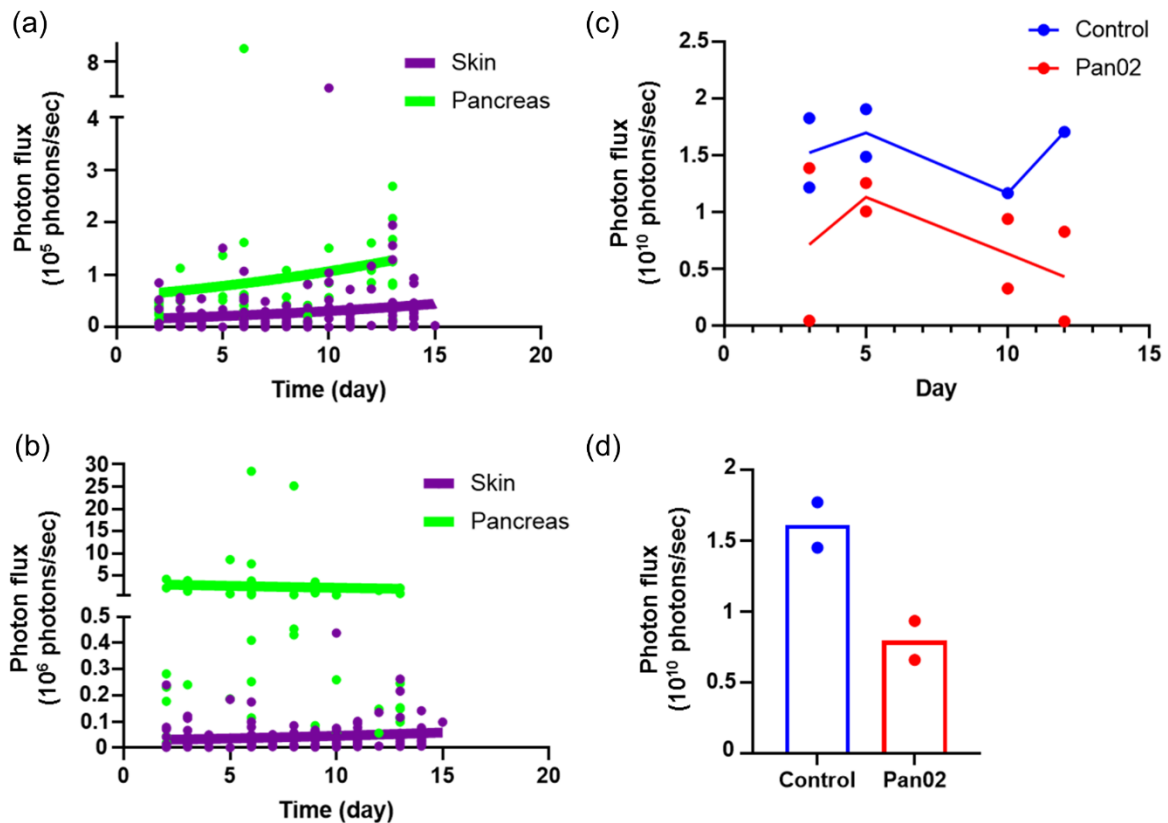

**Figure S4.** Bioluminescence quantification of (a) luminol and (b) L-012 signal comparing skin ( $n = 33$ , purple) and pancreas ( $n = 11$ , green) window chambers. Pancreas window chamber bioluminescent quantification of (c) p21 as a function of time, (d) time average of mean p21 activation in p21-FLuc pancreas window chamber-bearing animals without (blue) and with Pan02 Dendra2 reporter cells (red);  $n = 2$  animals.

## 1.2. Image J Macro Code

```
//this runs as a sub macro to Fileprepanroi.ijm
//it's job is to measure and save results for each modality.
//it should be passed the modality then a comma then the file name
//this assumes that there is at least one old image open for the get director to function
// v 1.1 remove the measurements and save as analyze format
```

```
args = split(getArgument(),",");
name = args[2];
acqtime = args[1];

imagedir = getDirectory("image");
roiManager("Deselect");
roiManager("Delete");//start with clean roiset
run("Clear Results");//start with clean results

animalnumberstart = indexOf(name,"S")+1;
animalnumberend = indexOf(name," ");
```

---

```
snumber = substring(name,animalnumberstart,animalnumberend);

daystart = indexOf(name,"day")+4;
dayend = indexOf(name," ",daystart);
days = substring(name,daystart,dayend);

modality = args[0];

fmodalitystart = dayend+1;
fmodalityend = indexOf(name," ",fmodalitystart);
fluorescencemodality = substring(name,fmodalitystart,fmodalityend);

//build new photo for new functional image
String.resetBuffer;
String.append(imagedir);
String.append("S");
String.append(snumber);
String.append(" day ");
String.append(days);
String.append(" ");
String.append(modality);
String.append(" photo");
String.append(".tif");
newphotfilename = String.buffer();
String.resetBuffer;
open(newphotfilename);

run("In [+]");
run("In [+]");
run("In [+]");
run("In [+]");
run("In [+]");
setTool("angle");
waitForUser("Use the angle tool to draw ROI from the two bolts to the vertical then click ok")
run("Measure");

measureangle= getResult("Angle",0);

run("Specify...", "width=22 height=22 x=51 y=50 oval");

waitForUser("Move the oval to the window and click ok");
run("ROI Manager...");
roiManager("Add");
roiManager("select",0);
```

---

```
//build name for window roi;
String.resetBuffer;
String.append(imagedir);
String.append("S");
String.append(snumber);
String.append(" day ");
String.append(days);
String.append(" ");
String.append(modality);
String.append(".zip");
windowroi = String.buffer();
String.resetBuffer;
//end build name for window roi

roiManager("Rename",windowroi);
roiManager("select",0);
roiManager("Save Selected",call("ij.plugin.frame.RoiManager.getName", 0));

//build name for opening functional image;
String.resetBuffer;
String.append(imagedir);
String.append("S");
String.append(snumber);
String.append(" day ");
String.append(days);
String.append(" ");
String.append(modality);
String.append(".tif");
functionalfilename = String.buffer();
String.resetBuffer;
//end build name for functional image

open(functionalfilename);

roiManager("Select", 0);
run("Crop");

run("Clear Outside");

//build WC only filename
String.resetBuffer;
String.append(imagedir);
```

---

```
String.append("S");
String.append(snumber);
String.append(" day ");
String.append(days);
String.append(" ");
String.append(modality);
String.append(" WC only");
String.append(".tif");
WCfilename = String.buffer();
String.resetBuffer;
//end build name for WC

//saveAs("Tiff", WCfilename);

run("Divide...", "value=&acqtime");

//build norm filename
String.resetBuffer;
String.append(imagedir);
String.append("S");
String.append(snumber);
String.append(" day ");
String.append(days);
String.append(" ");
String.append(modality);
String.append(" WC only");
String.append(" norm_");

//get seconds before decimal
textacqtime = d2s(acqtime,2);
timearray = split(textacqtime,".");
secondsnumber = timearray[0];
//get seconds after decimal
restnumber = timearray[1];
//creat a file friendly number with p in place of decimal
newseconds = secondsnumber+"p"+restnumber;

String.append(newseconds);
String.append(".tif");
WCnormfilename = String.buffer();
String.resetBuffer;
//end build norm filename

//saveAs("Tiff",WCnormfilename);
```

---

```
run("Rotate... ", "angle=&measureangle grid=1 interpolation=Bicubic");
```

```
//create new rotatefilename
```

```
String.resetBuffer;
```

```
oldfilenamearray = split(WCnormfilename, ".");
```

```
oldfilename = oldfilenamearray[0];
```

```
String.append(oldfilename);
```

```
String.append(" rotate");
```

```
//String.append(".tif");
```

```
WCnormrotfilename = String.buffer();
```

```
String.resetBuffer;
```

```
//end old rotatefilename
```

```
//saveAs("Tiff",WCnormrotfilename);
```

```
run("Analyze 7.5...", "save=&WCnormrotfilename");
```
